# Supplementary figures and images for: Development of a cyclometalated iridium complex with specific intramolecular hydrogen-bonding that acts as a fluorescent marker for the endoplasmic reticulum and causes photoinduced cell death
Source: Royal Society of Chemistry journal article supplement (doi:10.1039/c4dt00845f), 2014-10-23

## SUPPLEMENTARY INFORMATION 2

### EXPONENTIAL DECAY CURVE OF C1 – C11

C1

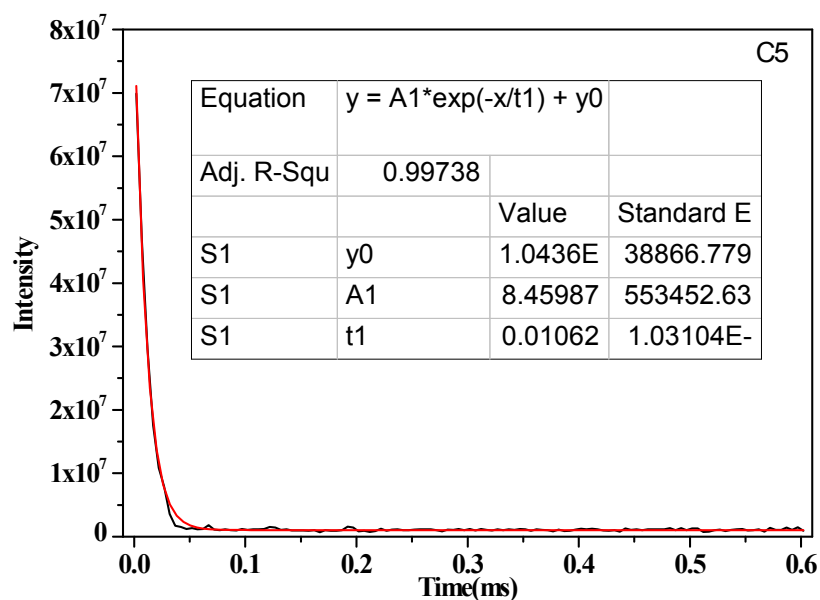

C2

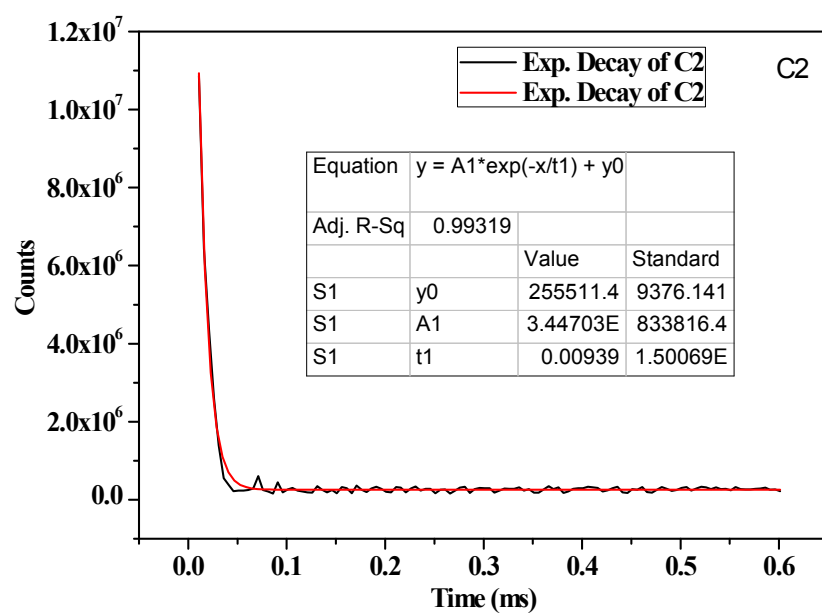

C3

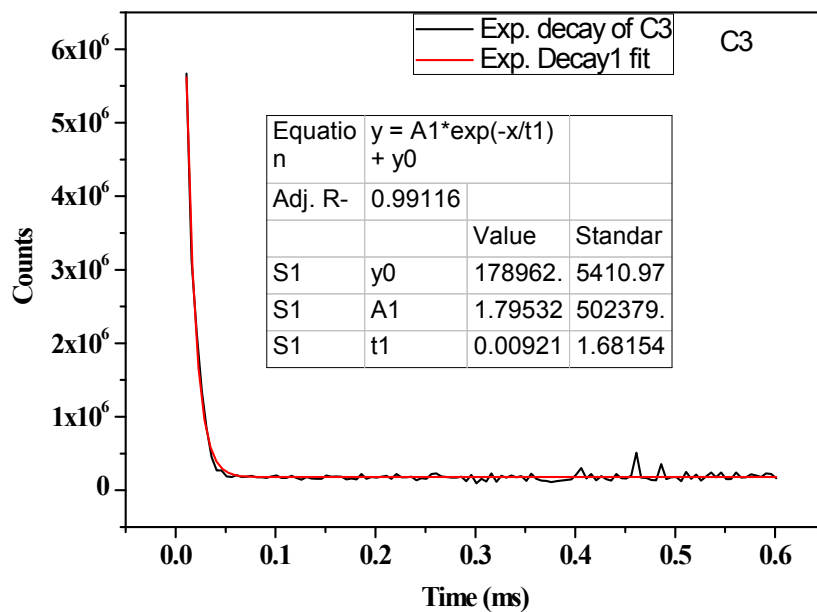

C4

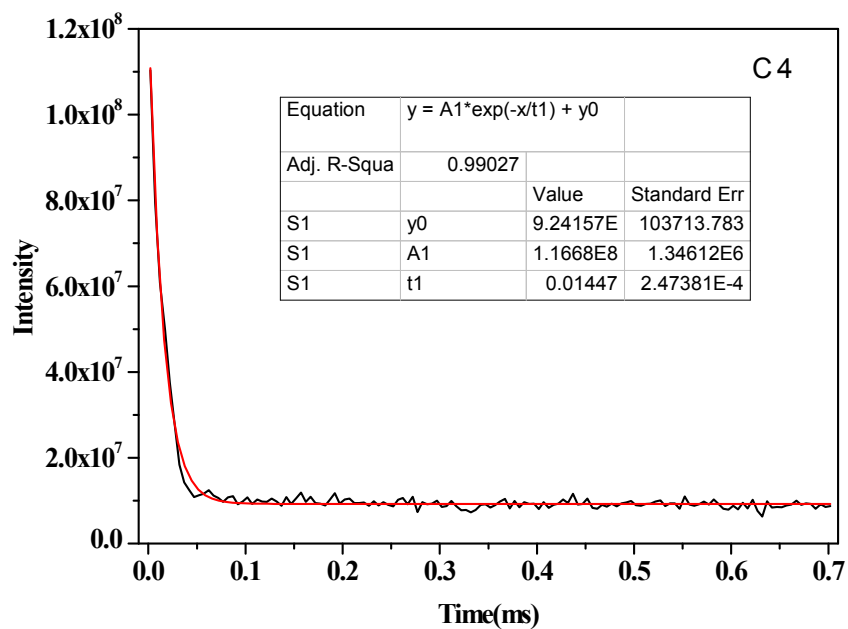

C5

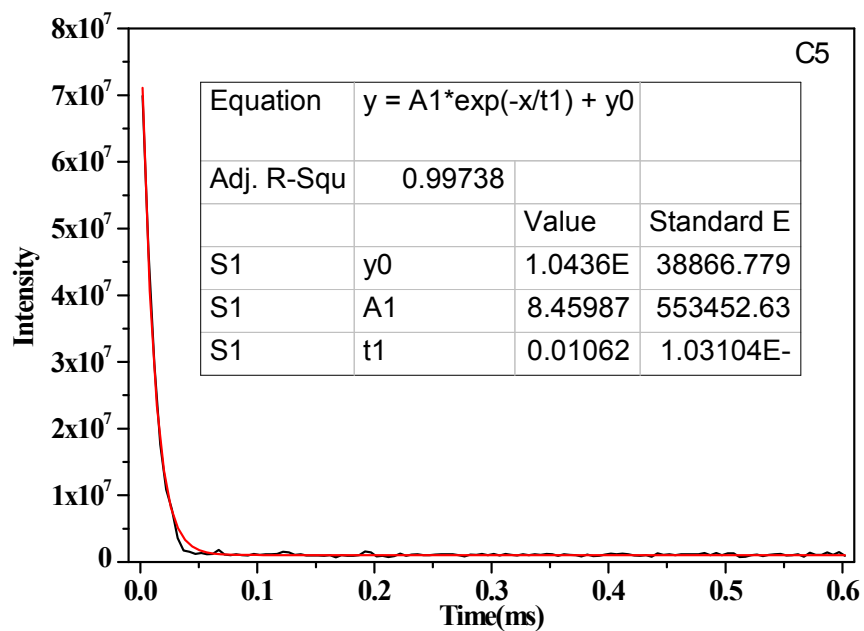

C6

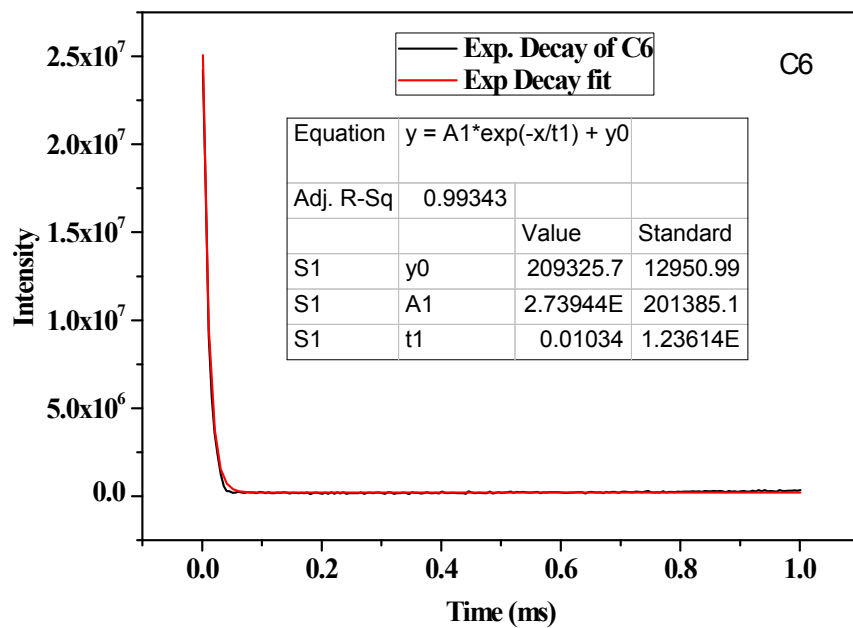

C7

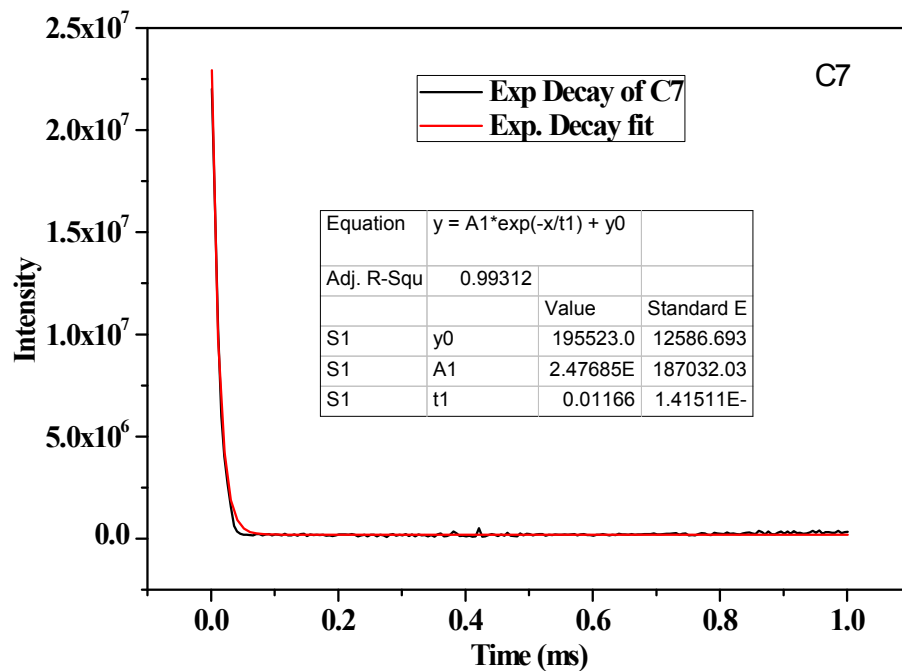

C8

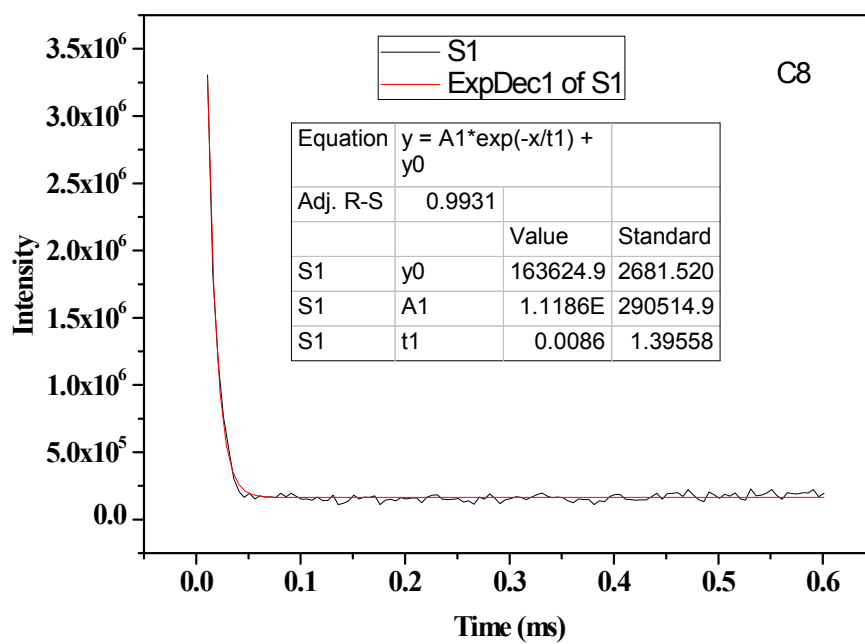

C9

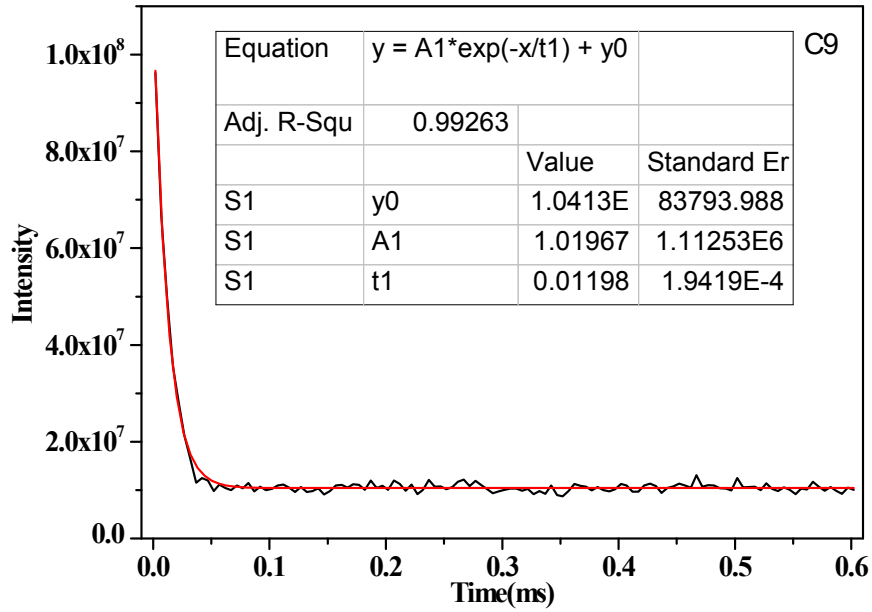

C 10

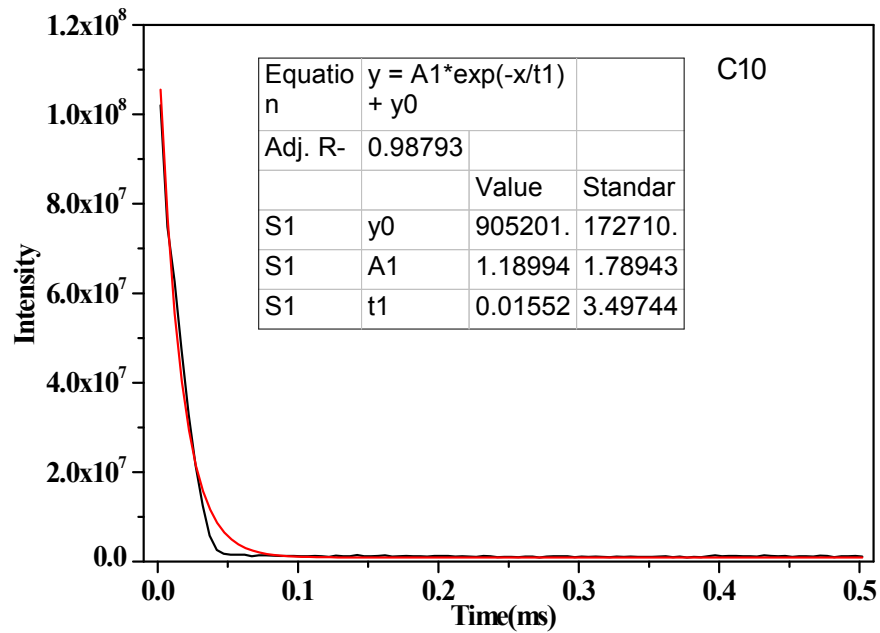

C11

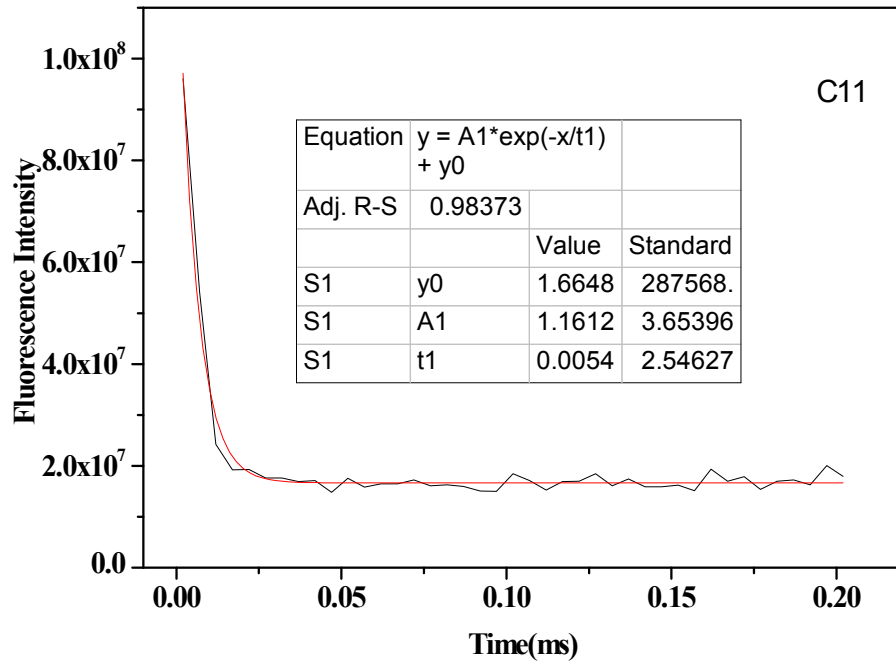

Supplement: c4dt00845f3.pdf [file c4dt00845f3.pdf]
